# Supplementary material for: Reporting of harms outcomes: a comparison of journal publications with unpublished clinical study reports of orlistat trials
Source: Springer Nature journal article supplement (doi:10.1186/s13063-016-1327-z), 2016-04-19
Supplement: MOESM1 [file 10043656]

# Reporting of harms outcomes: A comparison of journal publications with unpublished clinical study reports of orlistat trials

Alex Hodkinson<sup>1\*</sup>, Carrol Gamble<sup>1</sup>, Catrin Tudur Smith<sup>1</sup>

<sup>1</sup>MRC North West Hub for Trials Methodology Research, Department of Biostatistics, University of Liverpool, Liverpool.

\*Corresponding author

E-mail address: [ahoddy@liverpool.ac.uk](mailto:ahoddy@liverpool.ac.uk) (A.Hodkinson).

Supplementary Figure S1: Forest plots for all adverse event MedDRA preferred terms reported in CSR and journal publications.

These meta-analysis results are based on a subset of the eligible trials of orlistat and are presented for the purpose of methodological comparison rather than definitive clinical results

## Gastrointestinal disorders

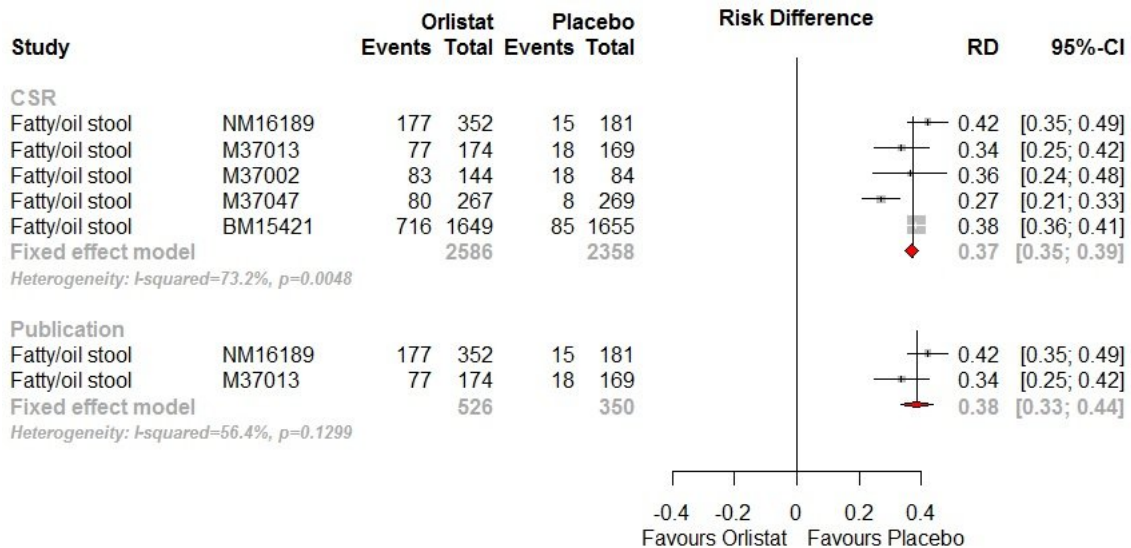

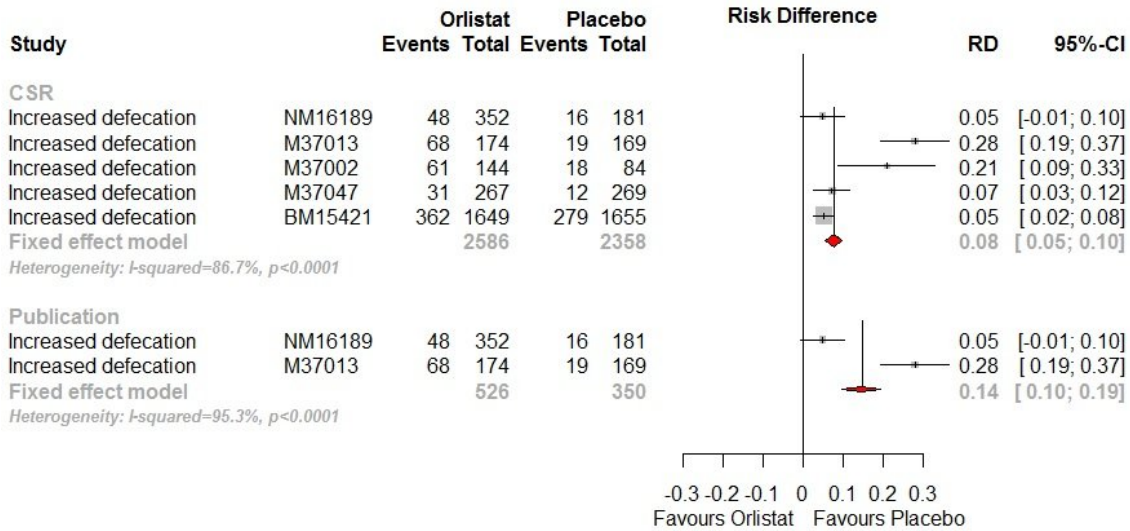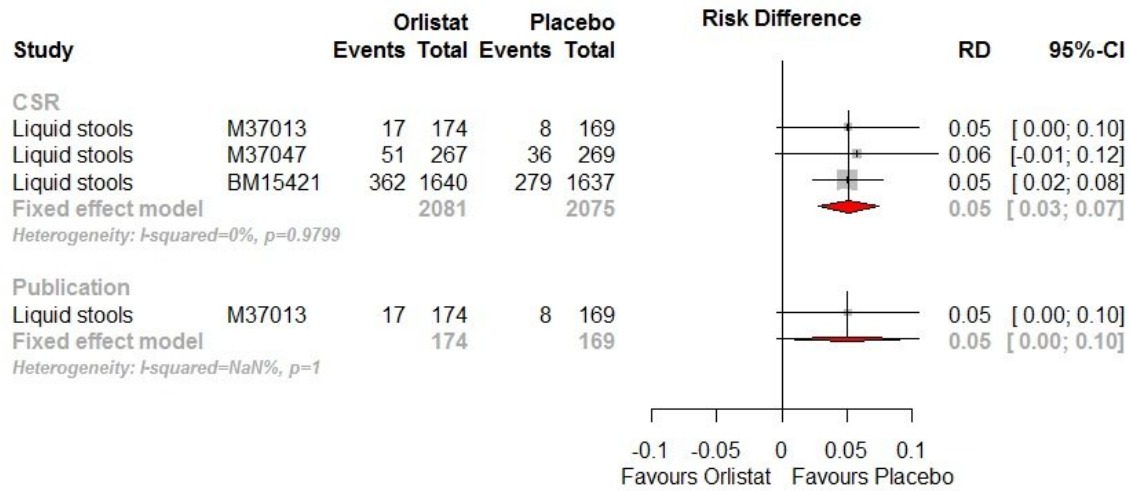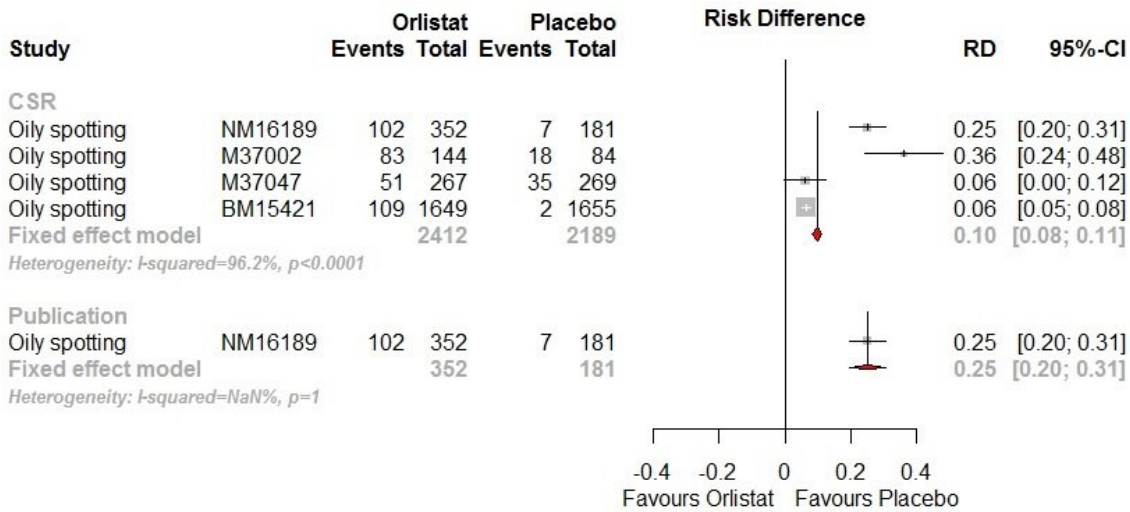

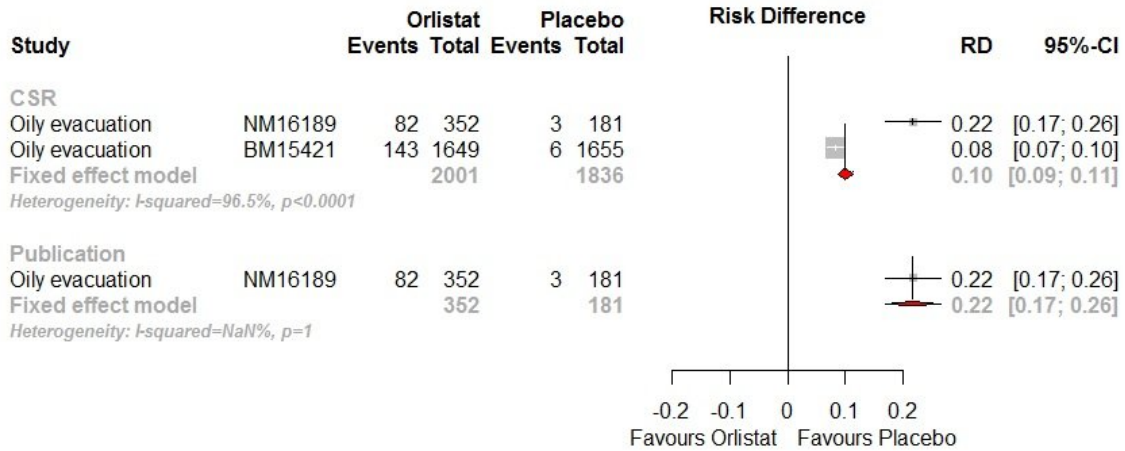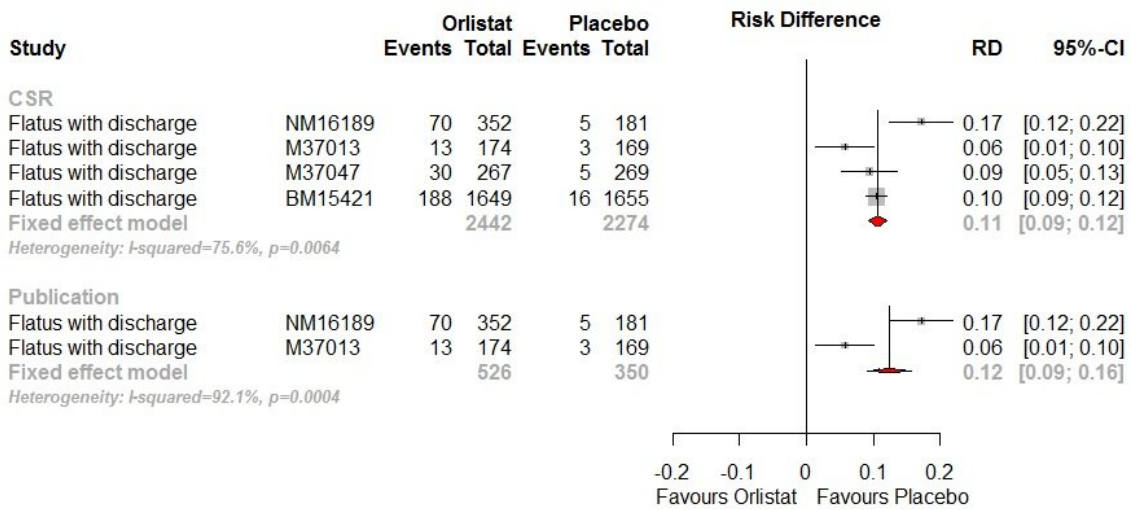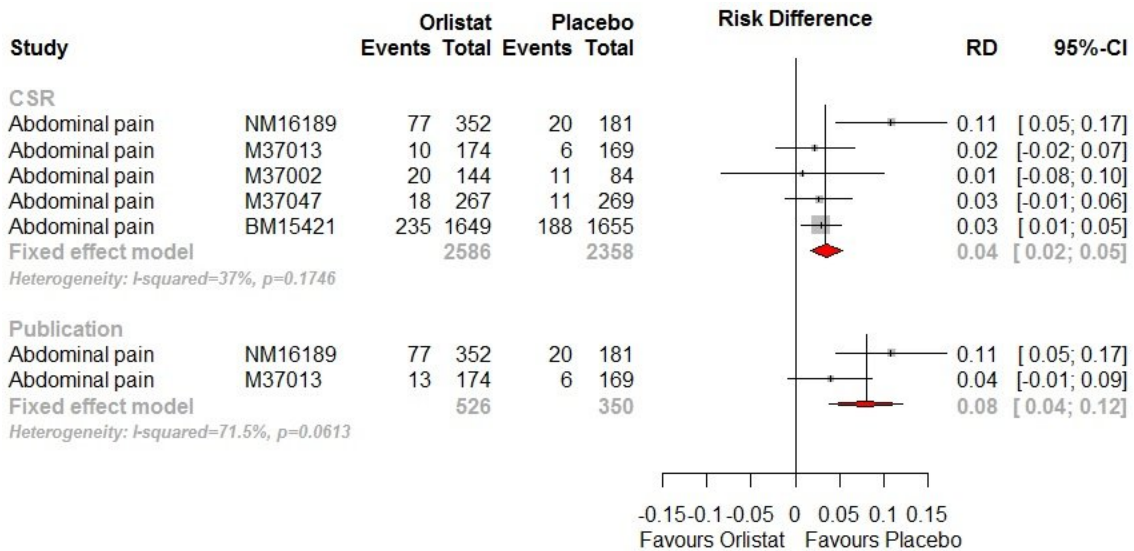

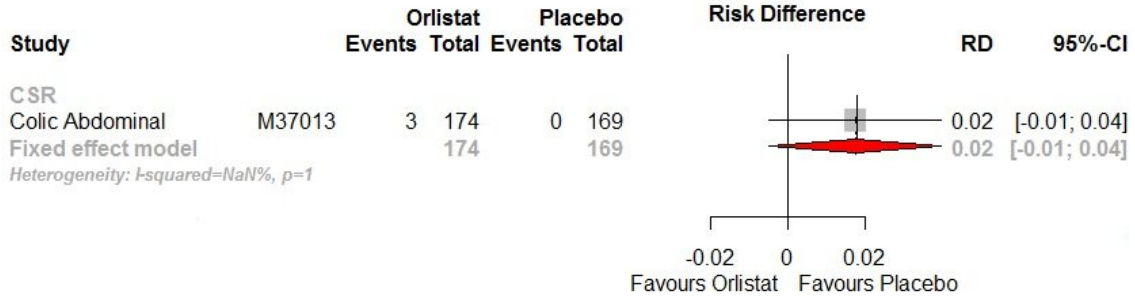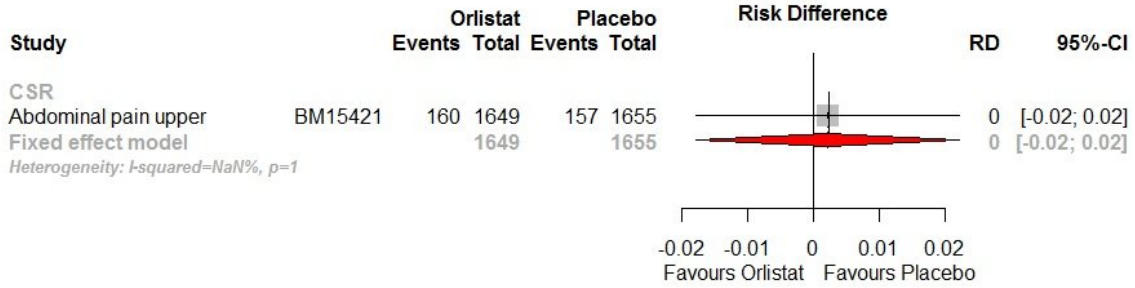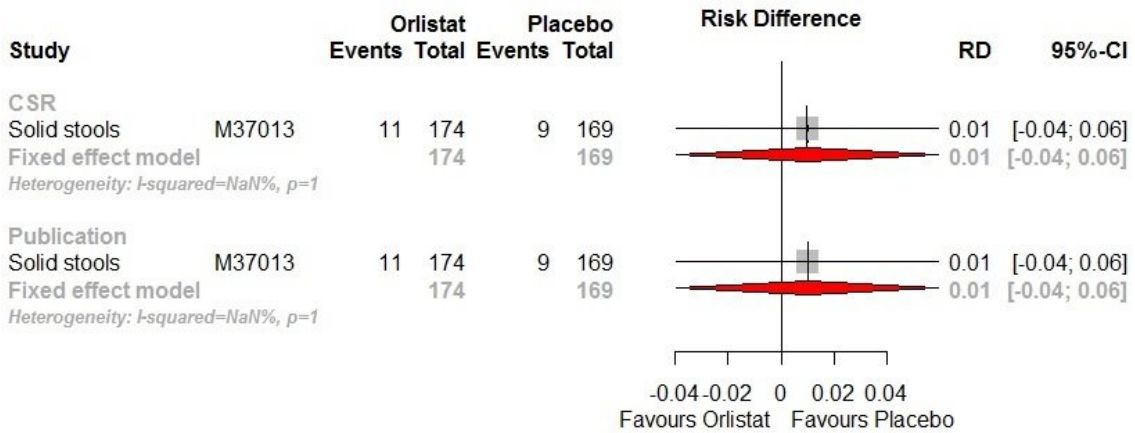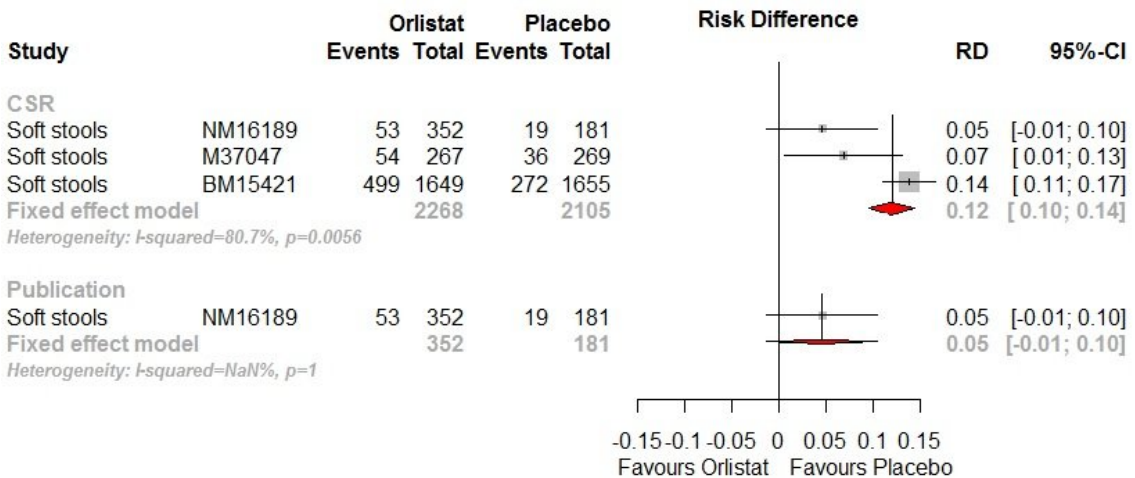

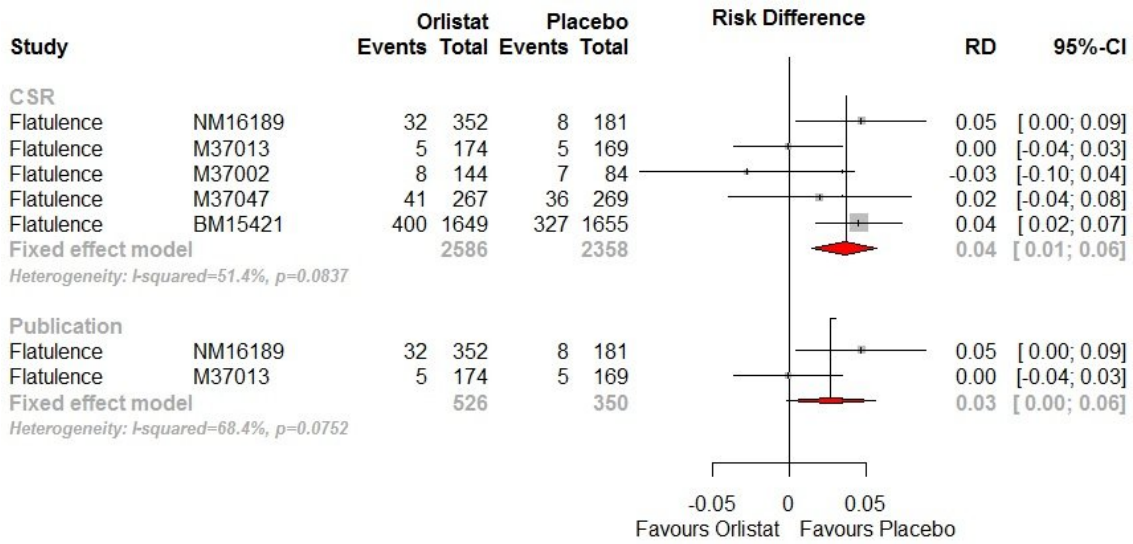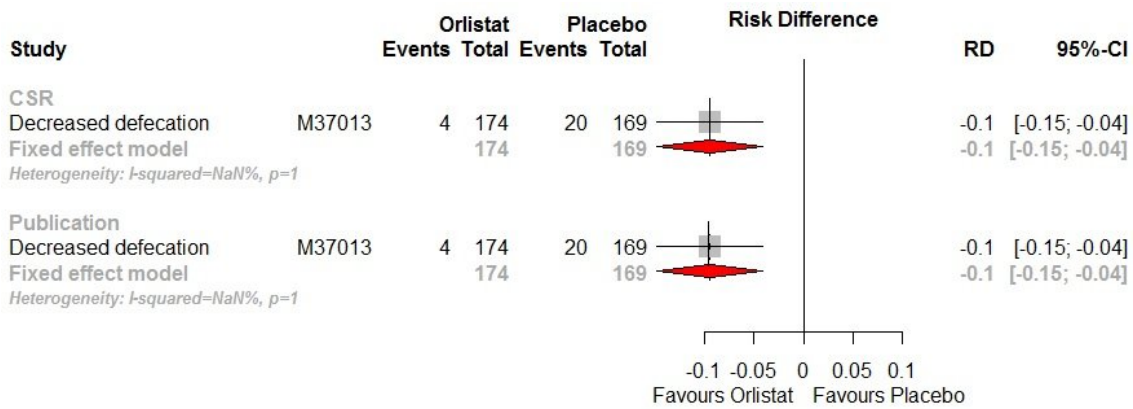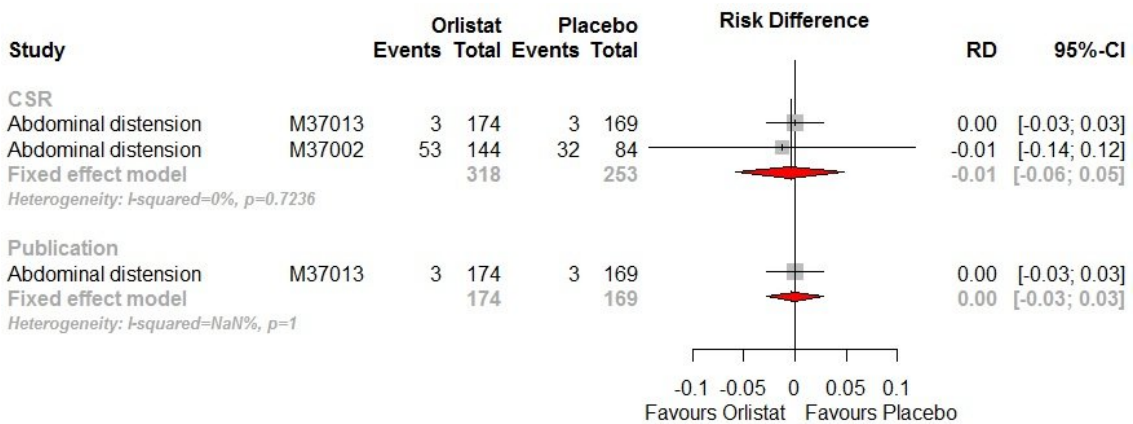

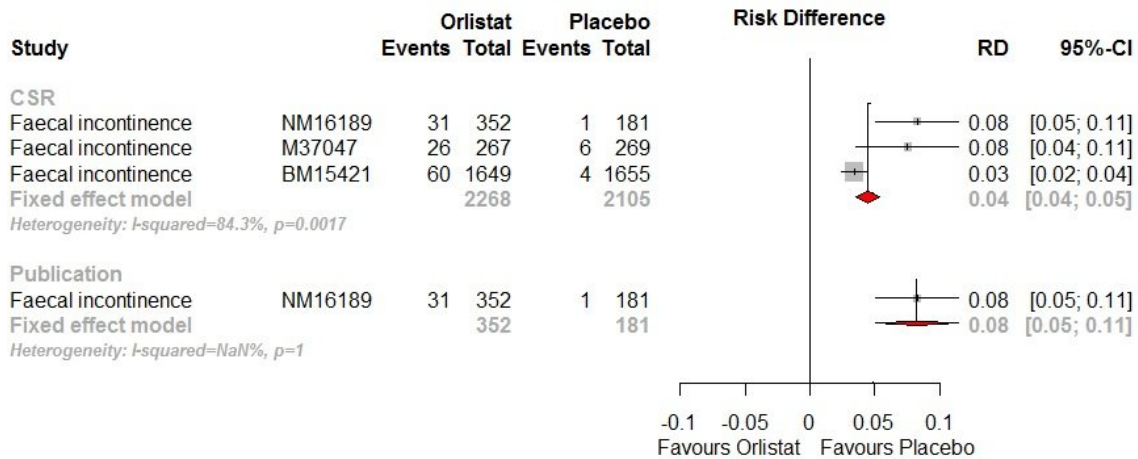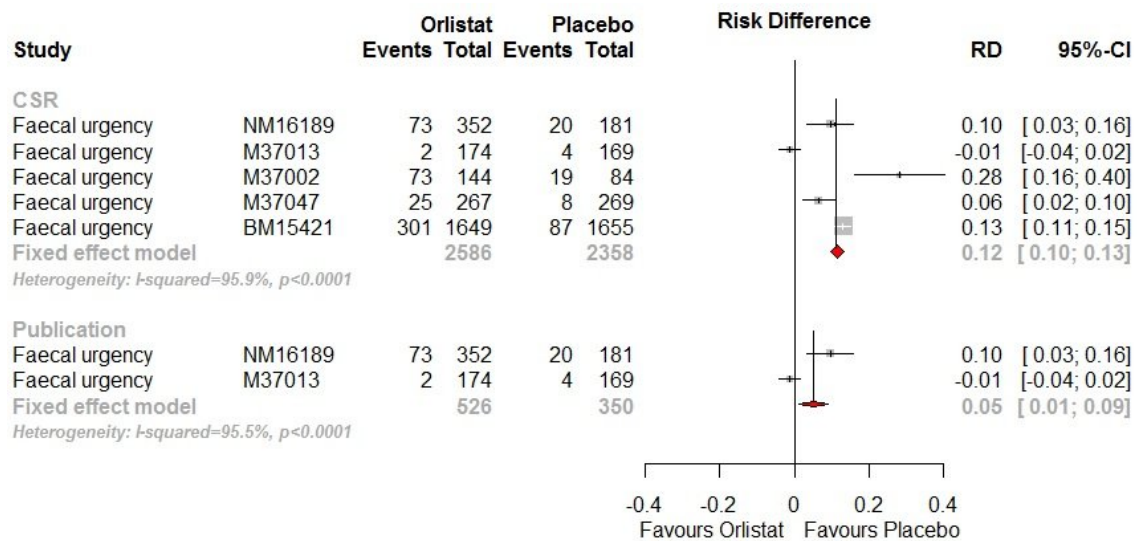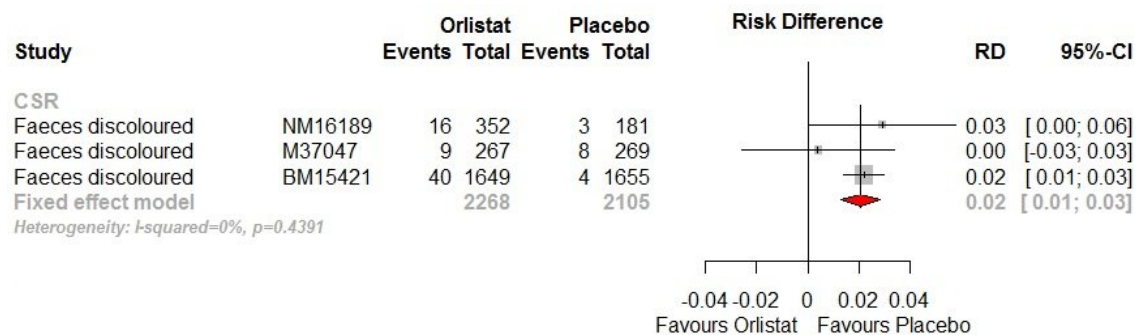

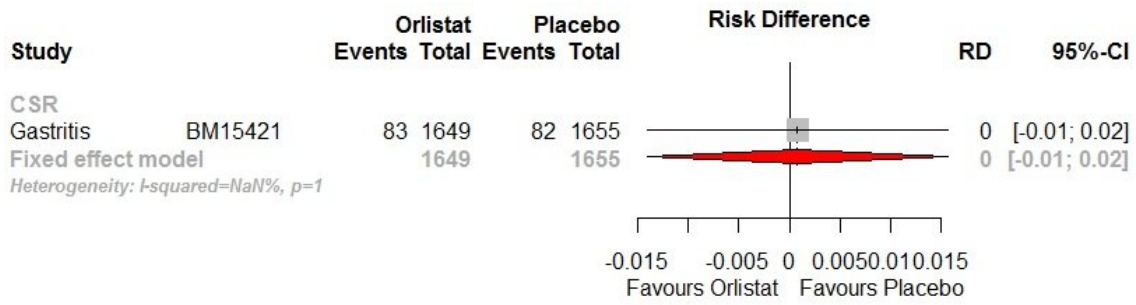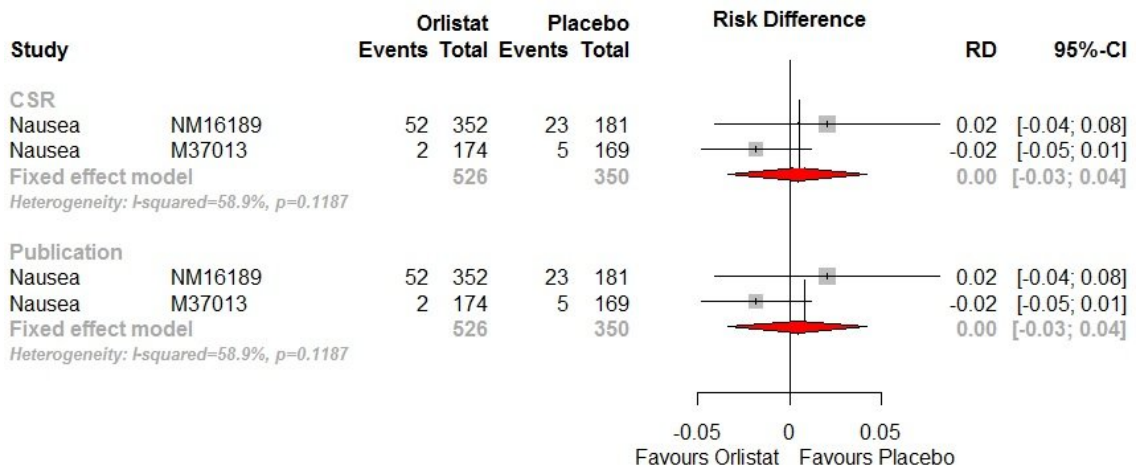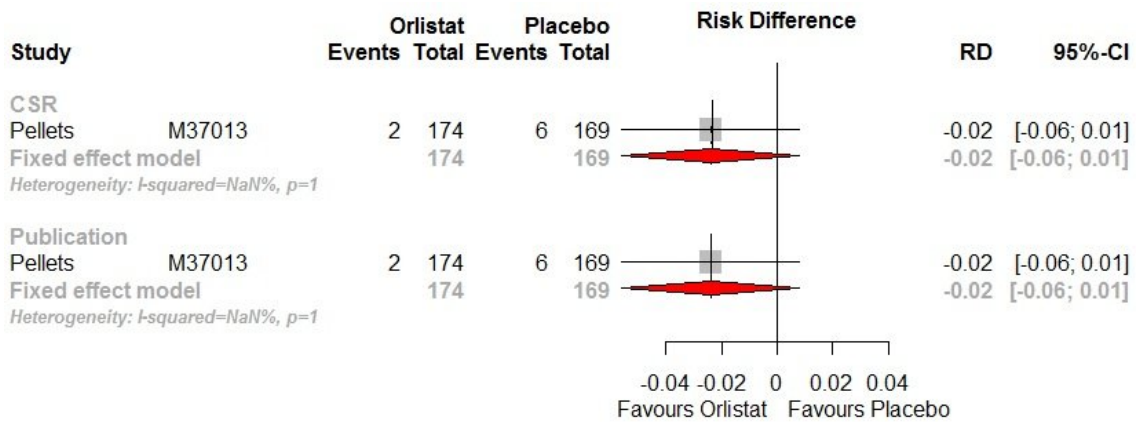

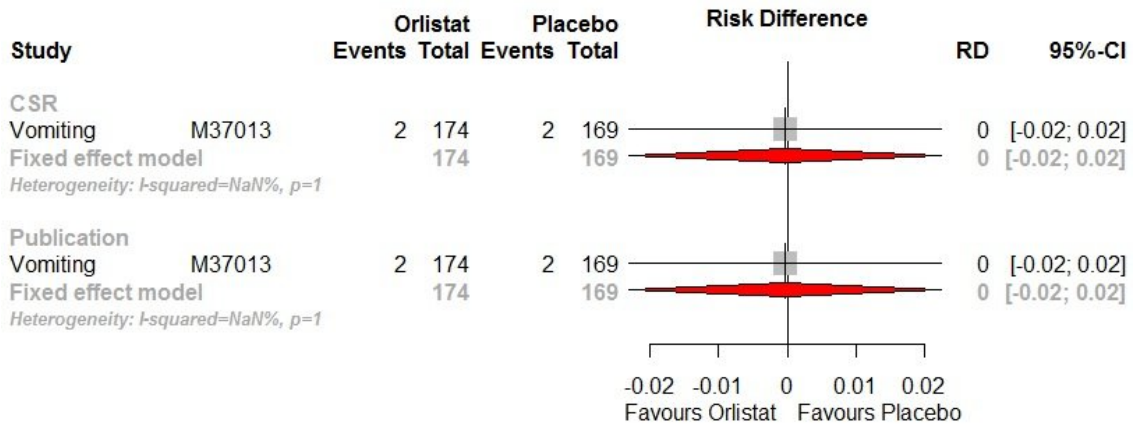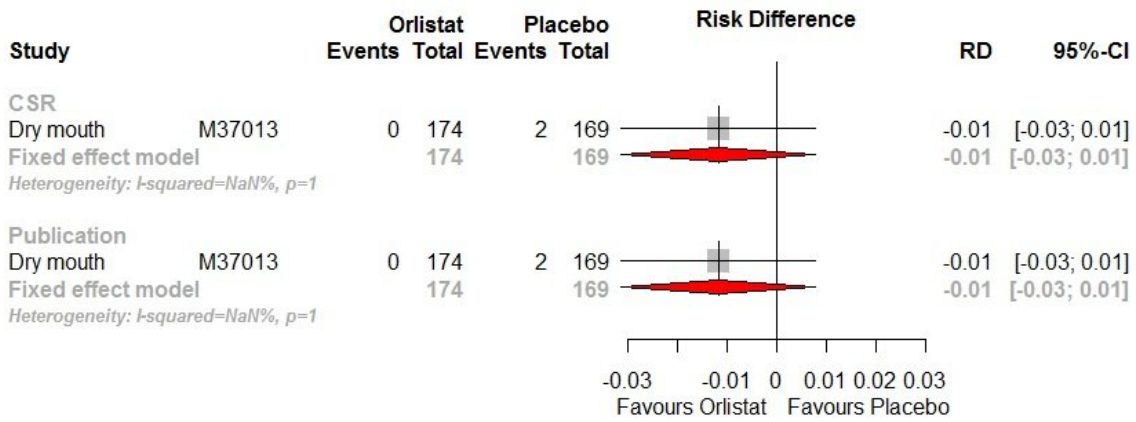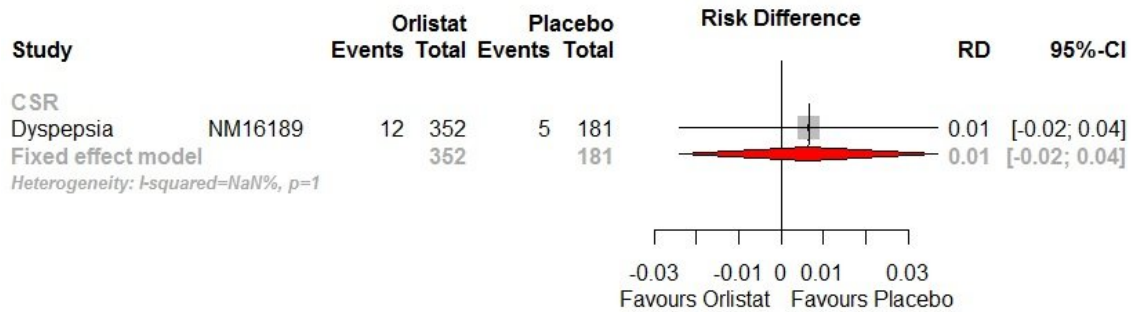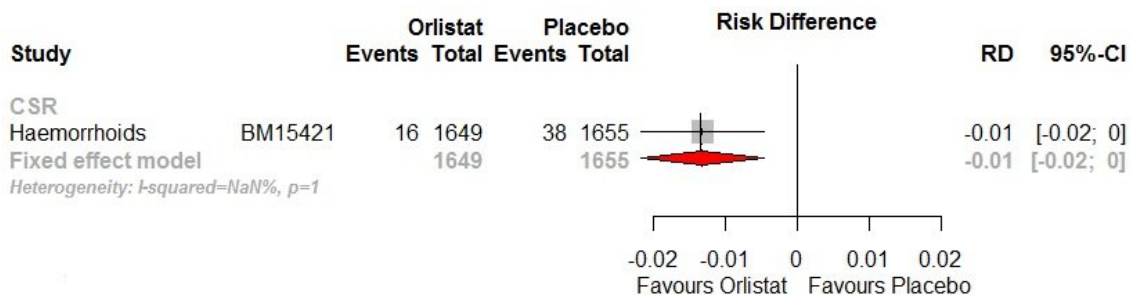



## Infections and infestations

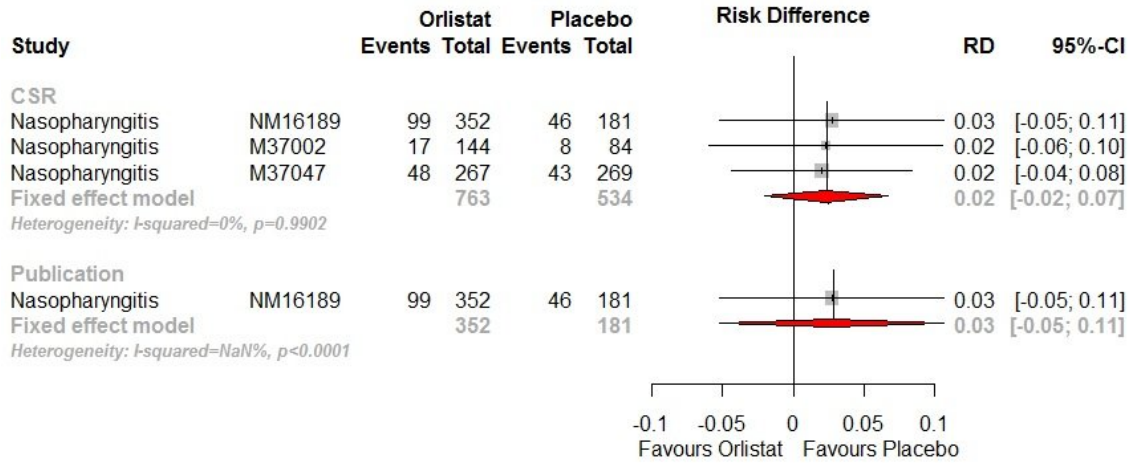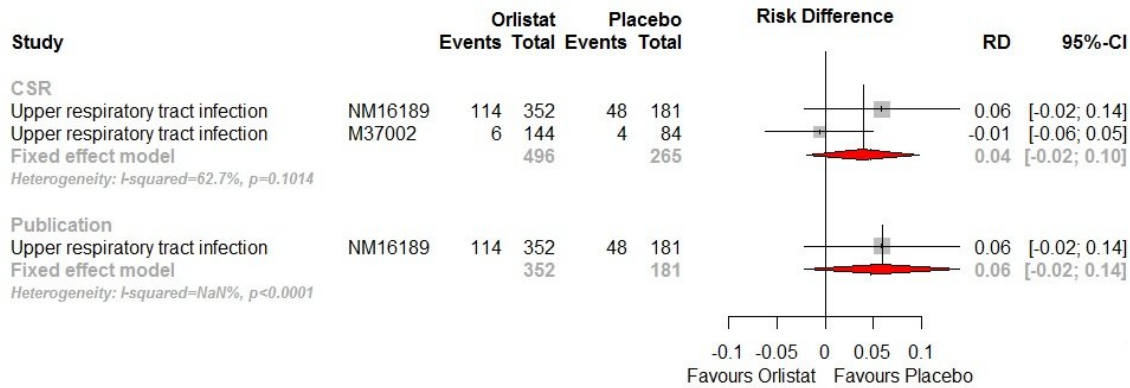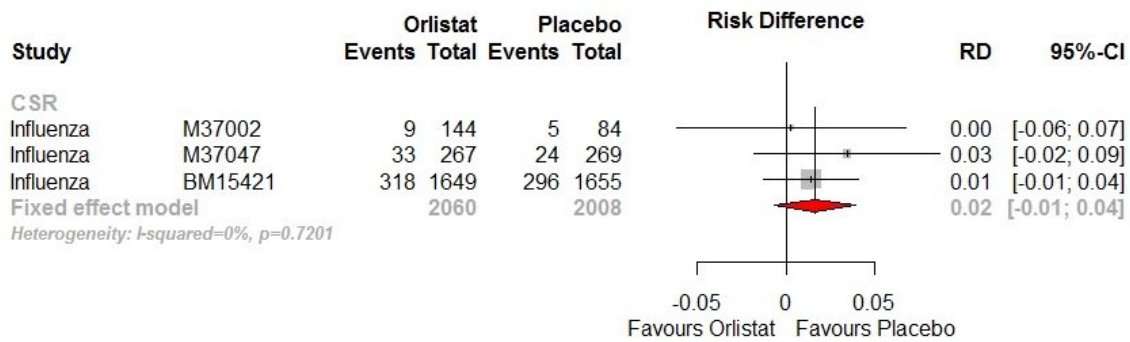

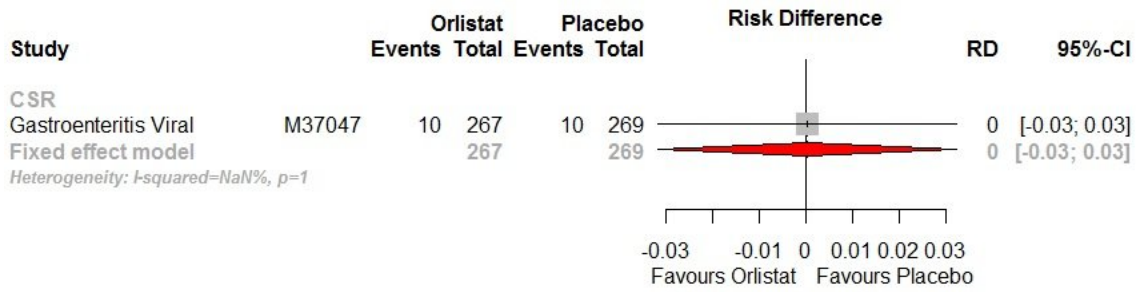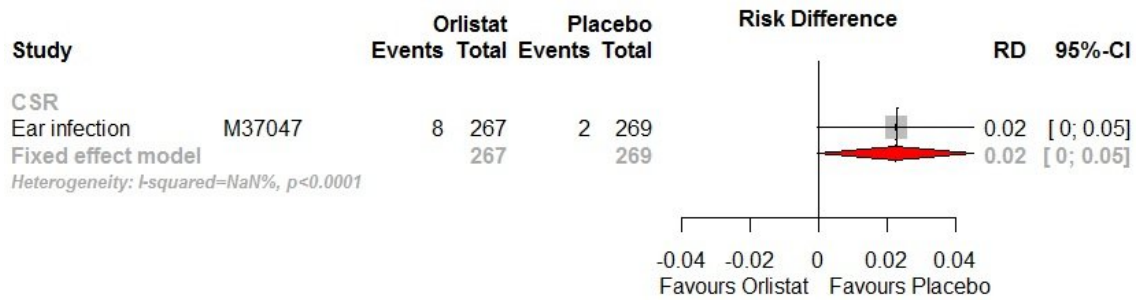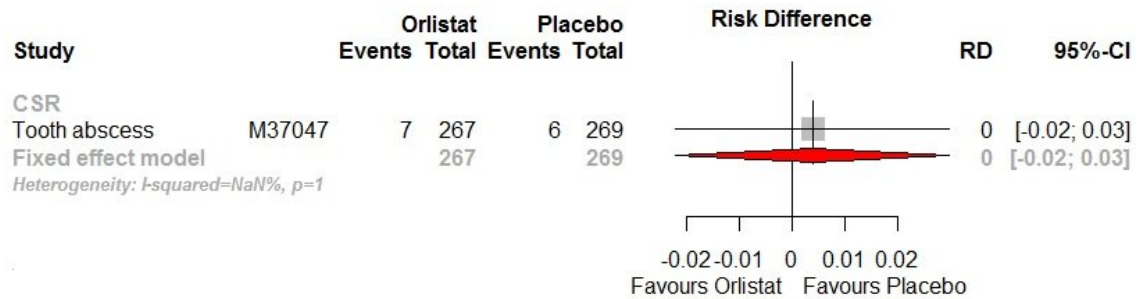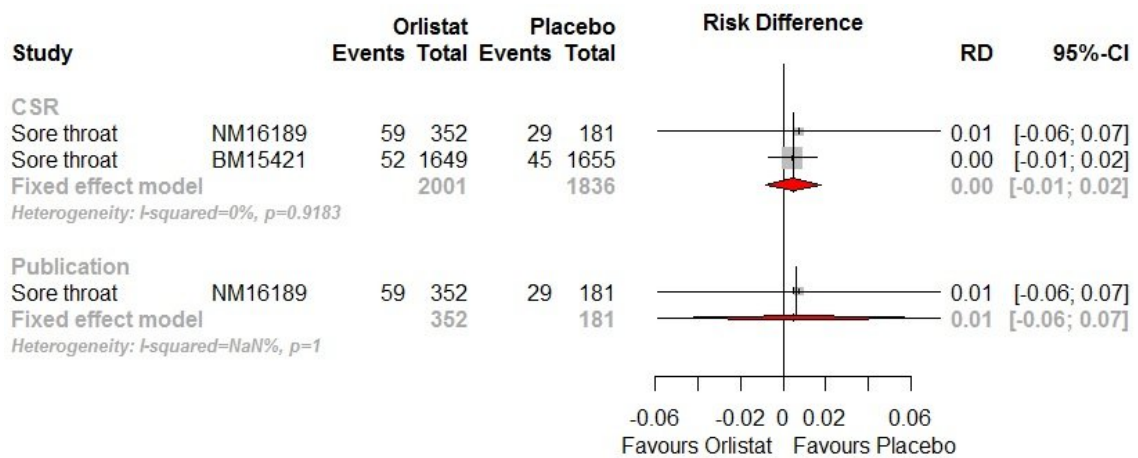

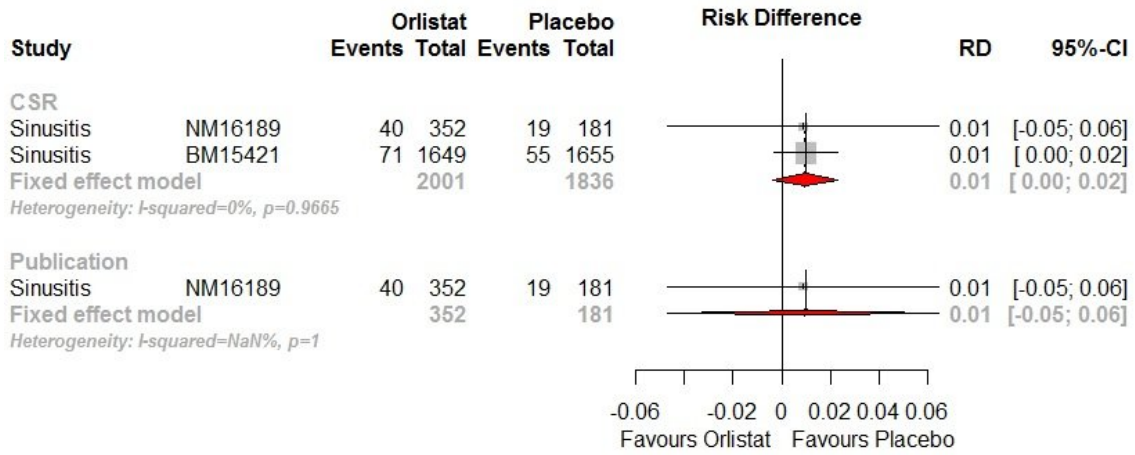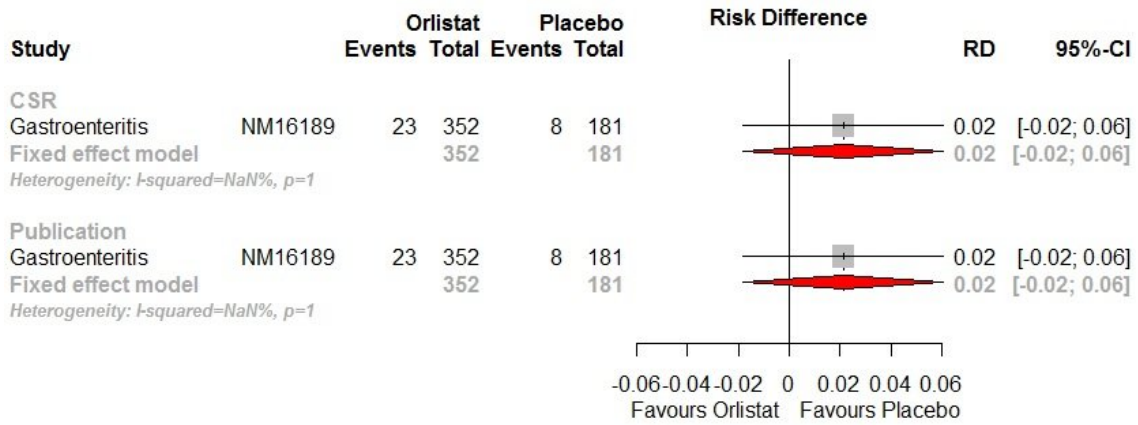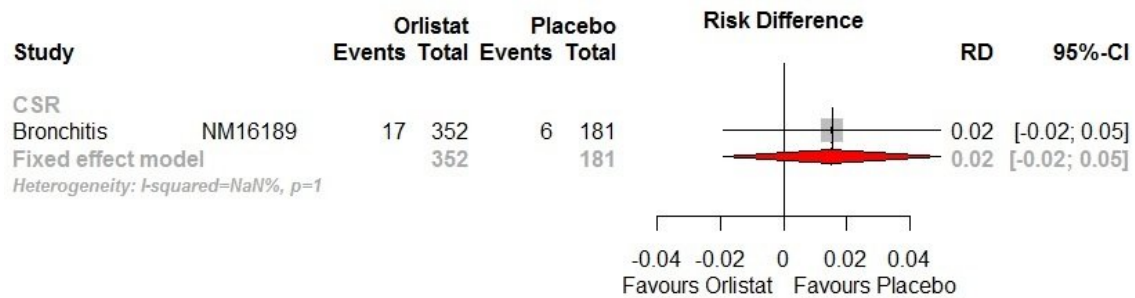

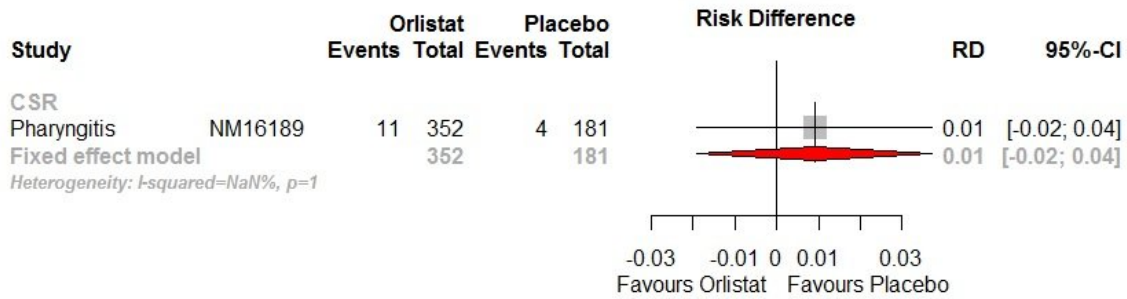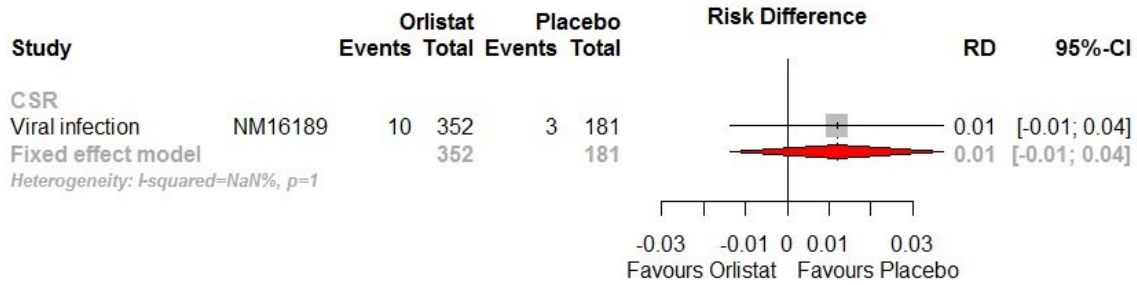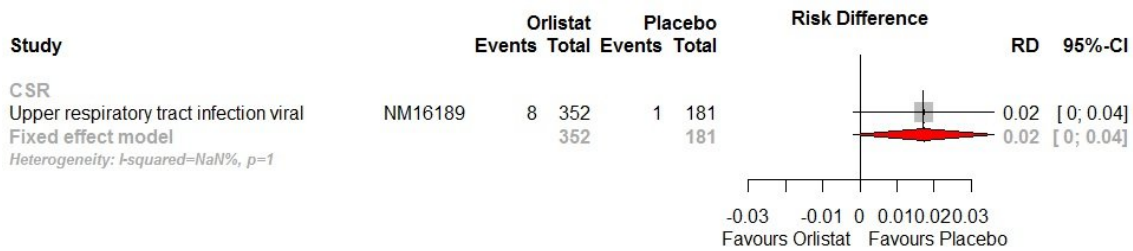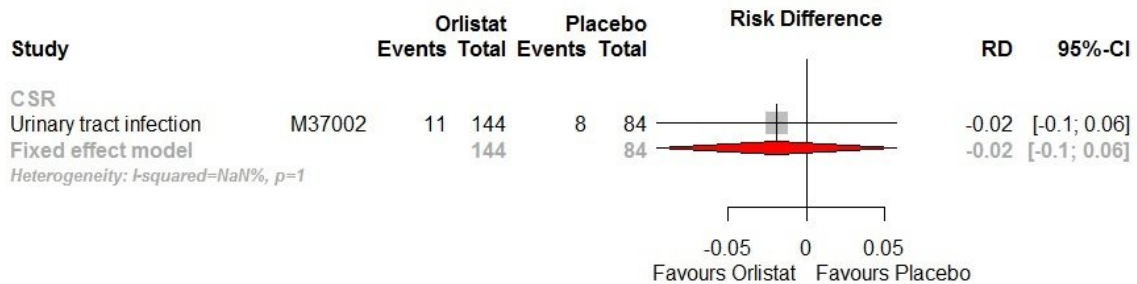

## Metabolism and nutrition disorders

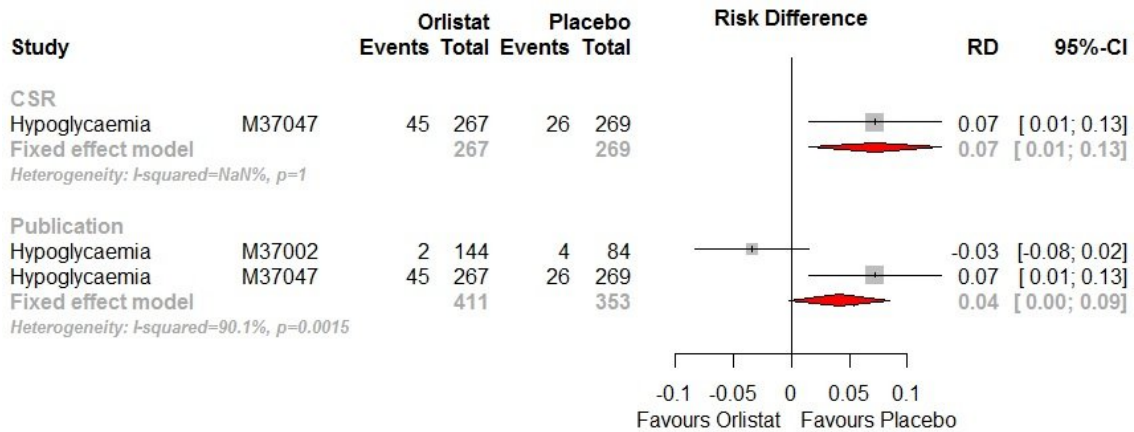

## General disorders and administration site conditions

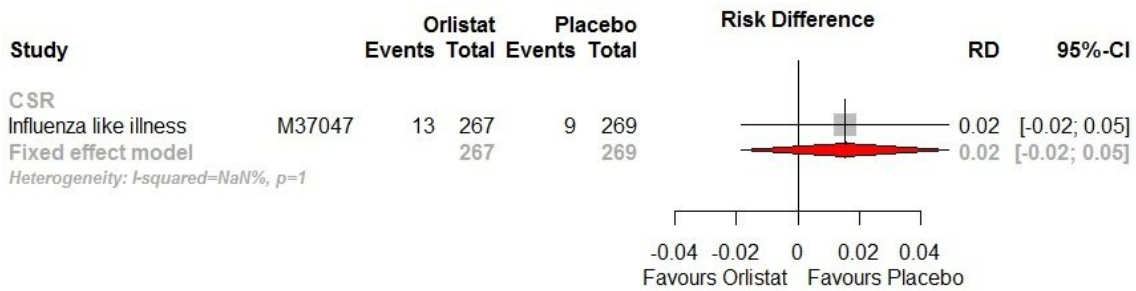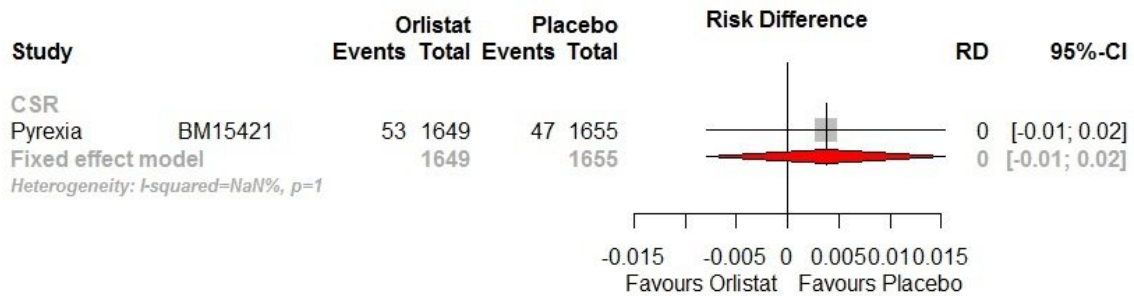

## Nervous system disorders

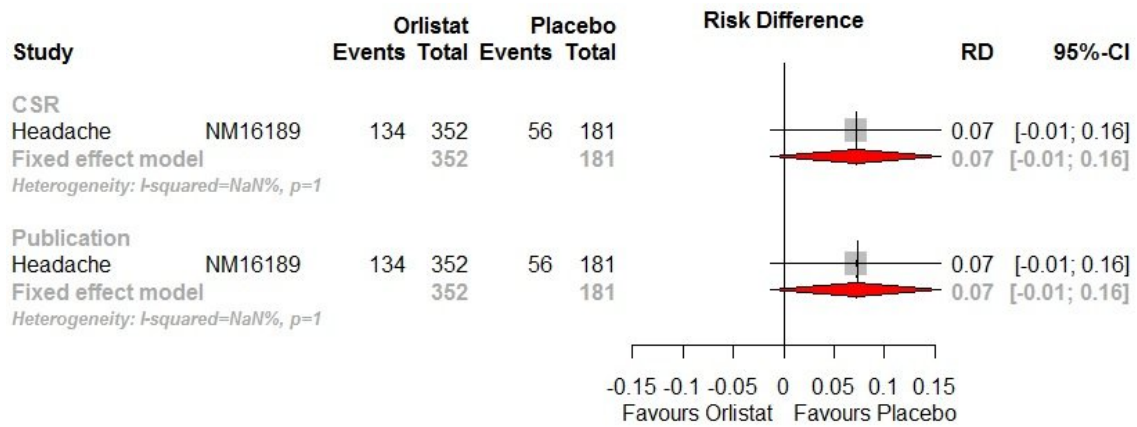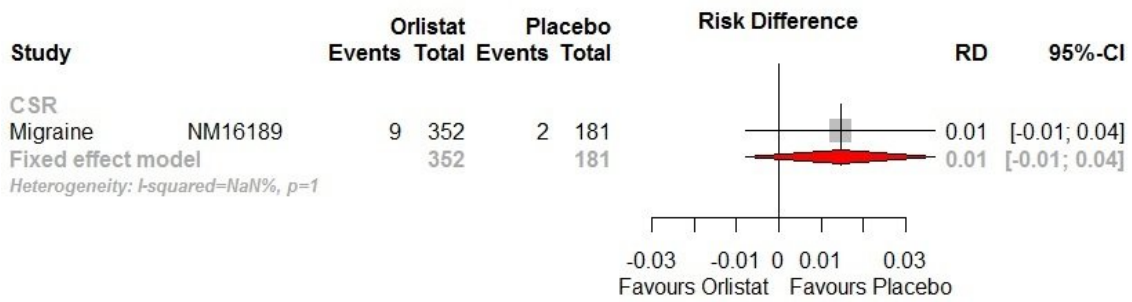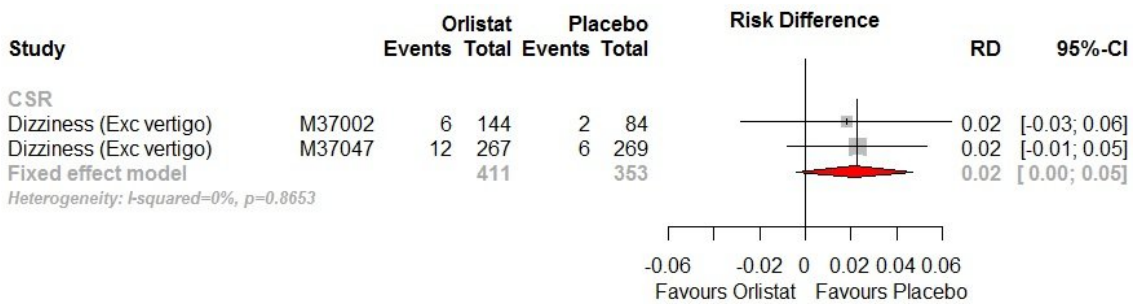

## Psychiatric disorders

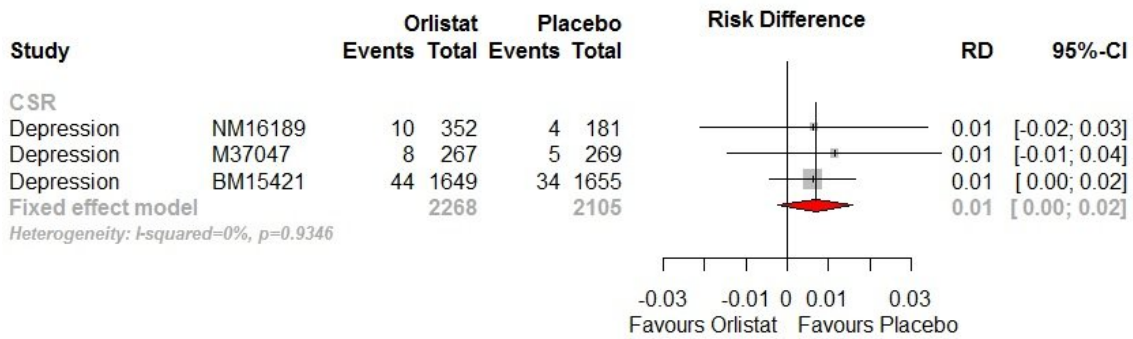

## Respiratory, thoracic and medicinal disorders

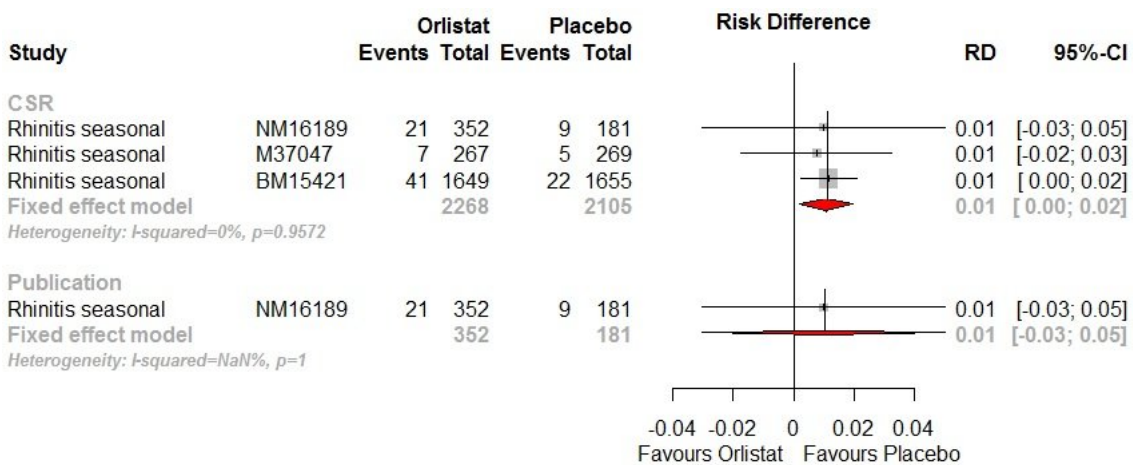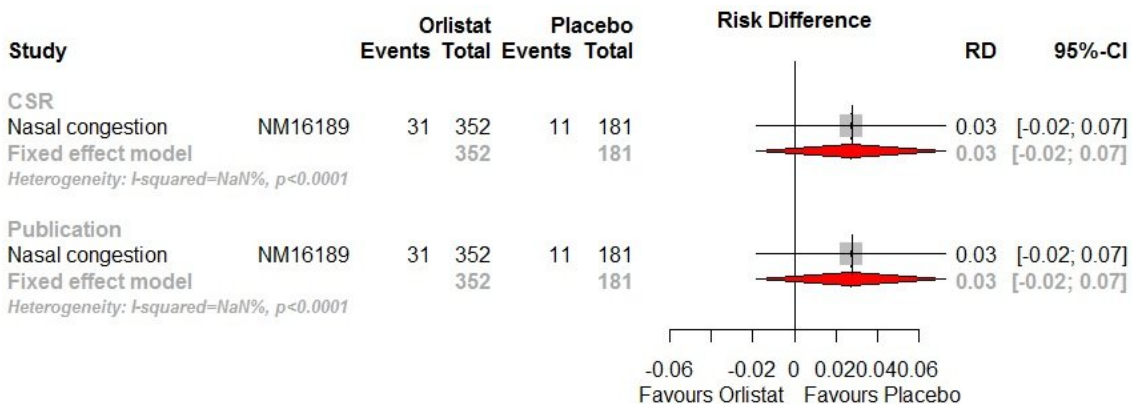

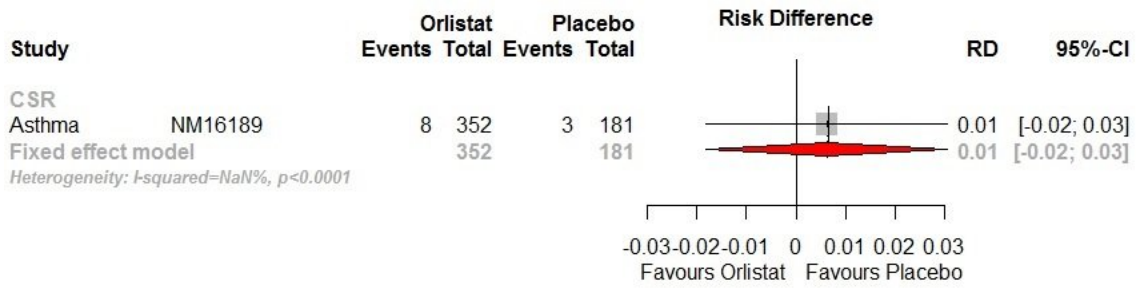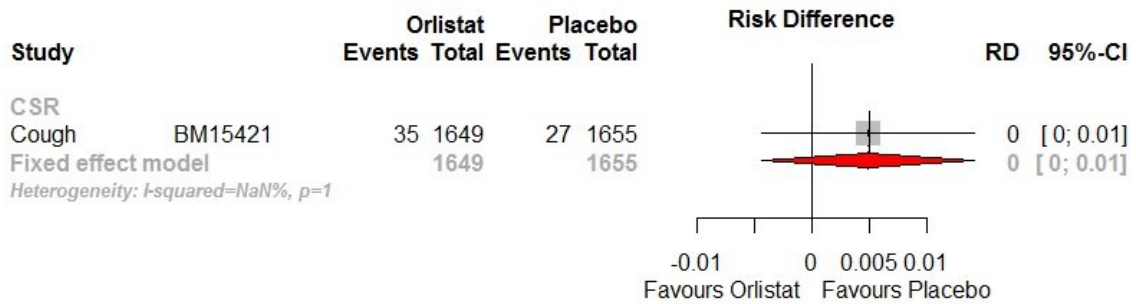

### Skin & Subcutaneous tissue disorders

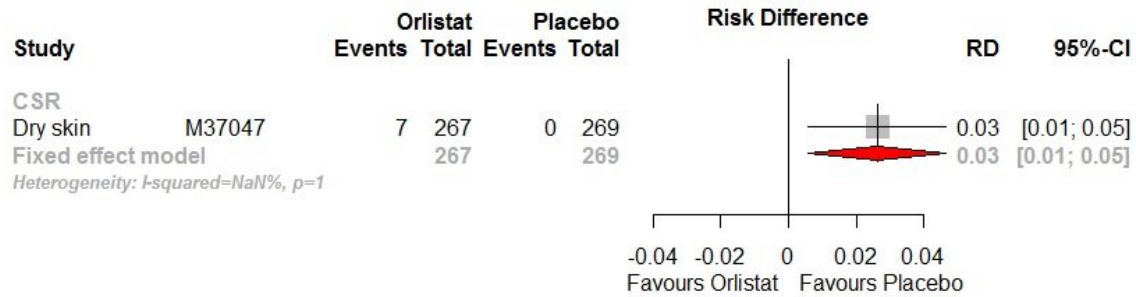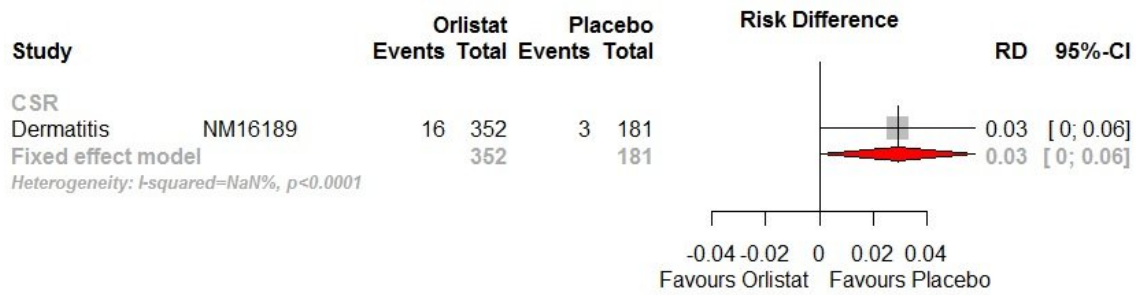



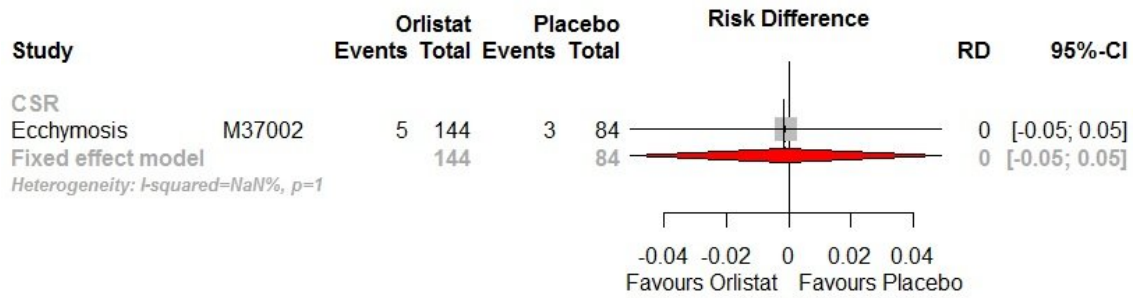

### Injury and positioning

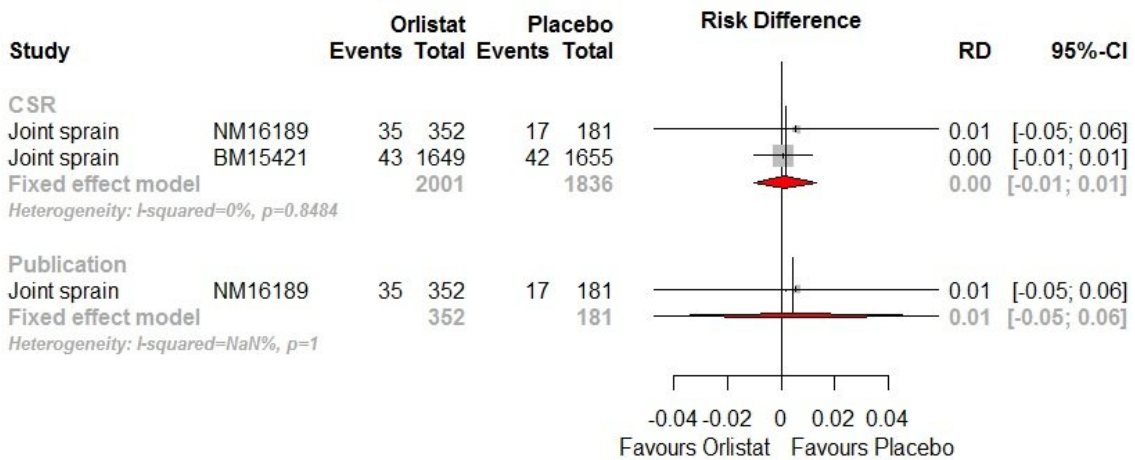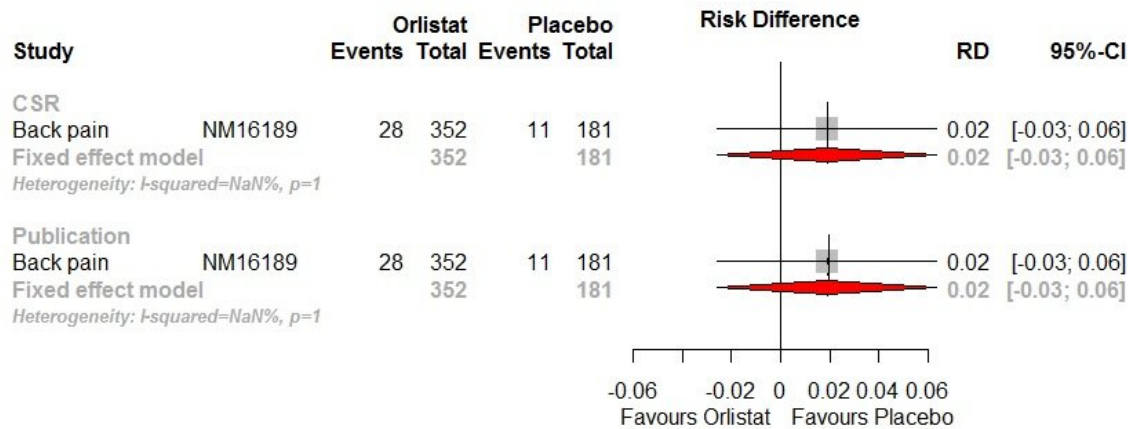

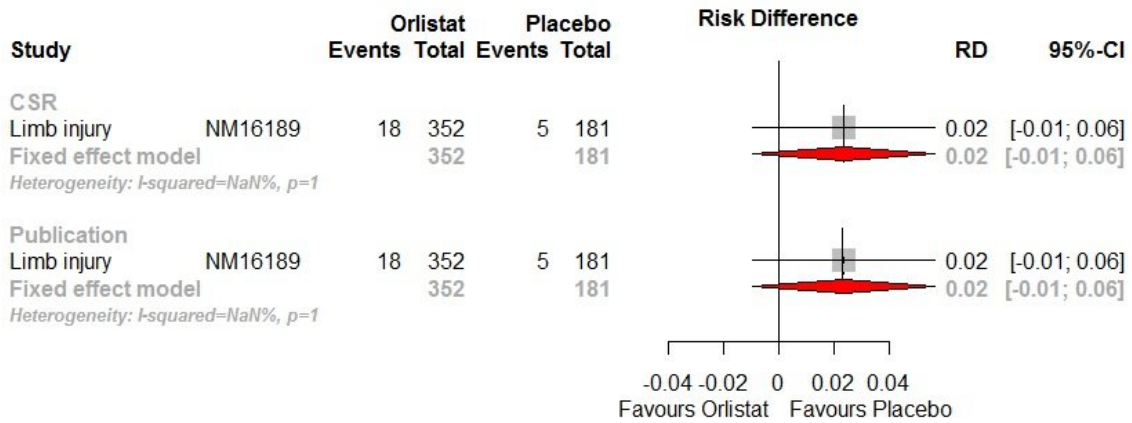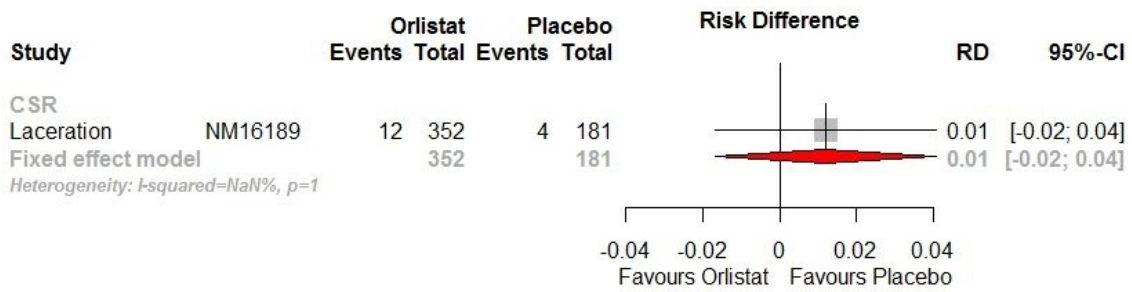

### Immune system disorders

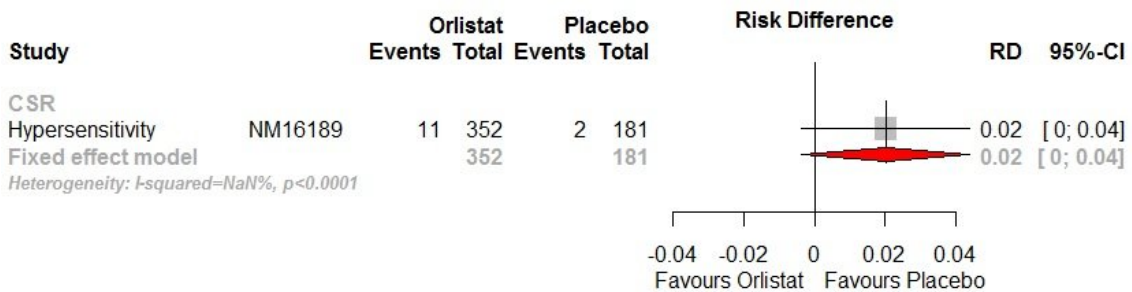

### Musculoskeletal, connective tissue and bone disorders

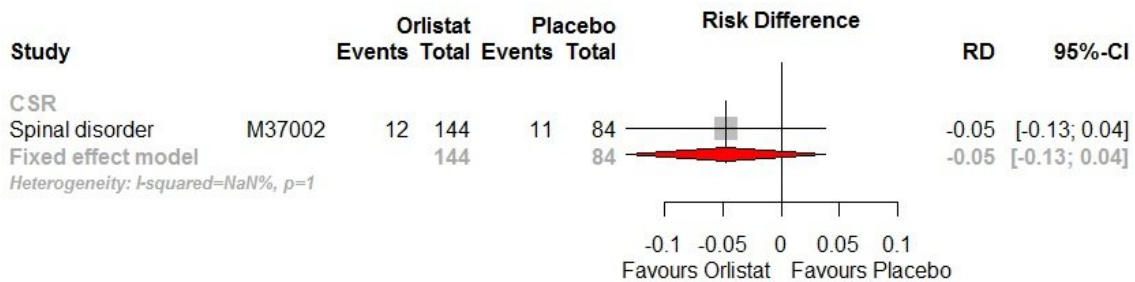

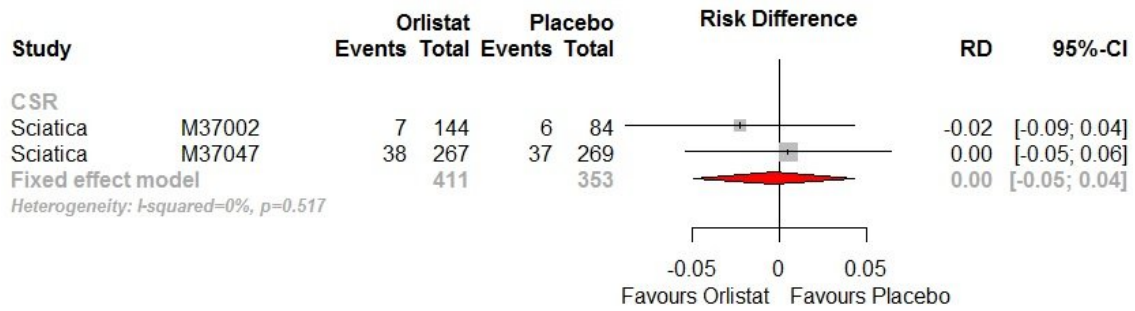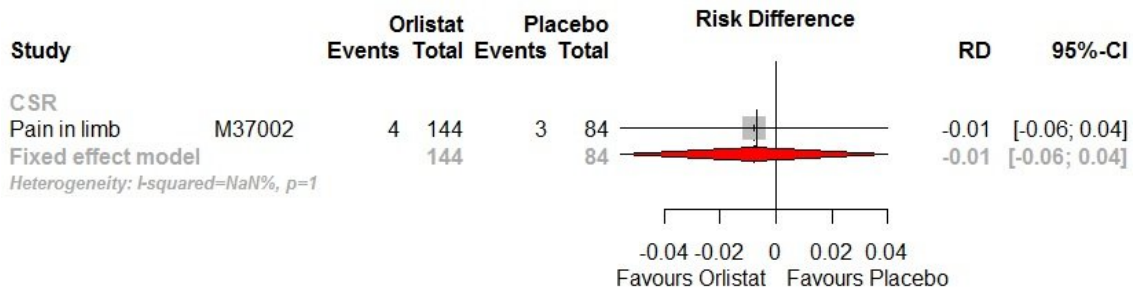

### Varicose veins

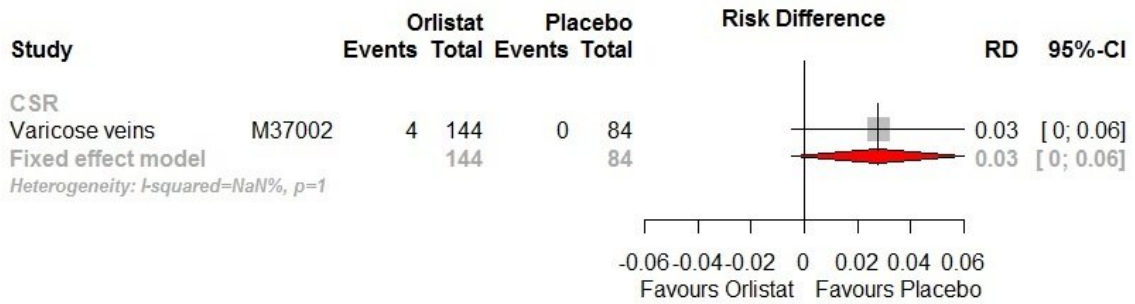

Supplementary Table S1: Search criteria used in both Cochrane central and MEDLINE.

| Search set | CENTRAL               | MEDLINE                         |
|------------|-----------------------|---------------------------------|
| 1          | (Orlistat or Xenical) | randomized controlled trial.pt. |
| 2          |                       | controlled clinical trial.pt.   |
| 3          |                       | randomized.ab.                  |
| 4          |                       | placebo.ab.                     |
| 5          |                       | clinical trials as topic.sh.    |
| 6          |                       | randomly.ab.                    |
| 7          |                       | trial.ti.                       |
| 8          |                       | 7 or 5 or 2 or 6 or 1 or 4 or 3 |
| 9          |                       | (orlistat or Xenical).tw.       |
| 10         |                       | 8 and 9                         |
